# Supplementary material
Source: HighWire-hosted journal article supplement (https://jcptest-stage.highwire.org/content/jclinpath-2020-206917)
Supplement: inline-supplementary-material-1 [file inline-supplementary-material-1.pdf]

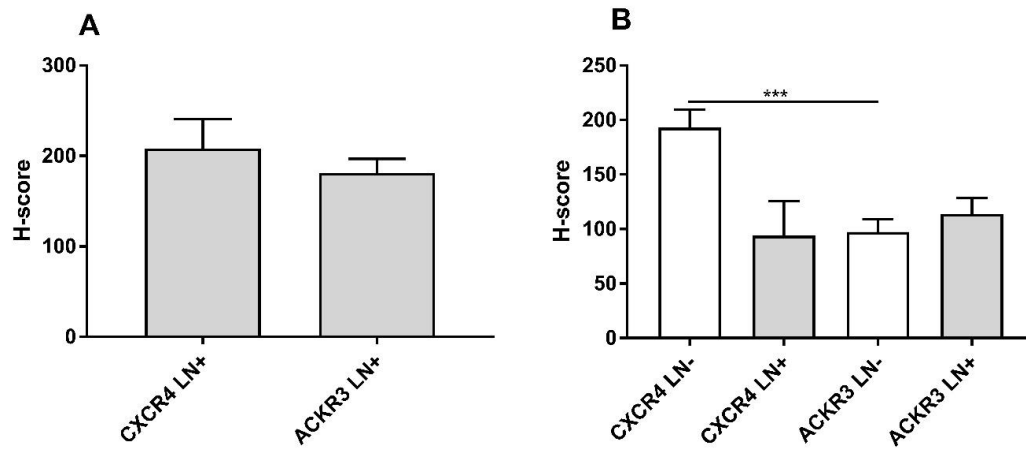

**Supplemental figure 1** CXCR4 and ACKR3 histoscore (H-score) assessment results for metastatic cells (A) and lymphocytes (B), the involved lymph nodes (LN+; n=8) and metastasis-free lymph nodes (LN-; n=29) in VSCC.
